# Supplementary material for: Integrated pancancer analysis reveals the oncogene characteristics and prognostic value of DIP2B in breast cancer
Source: Springer Nature journal article supplement (doi:10.1186/s12885-023-10751-3), 2023-03-31

A

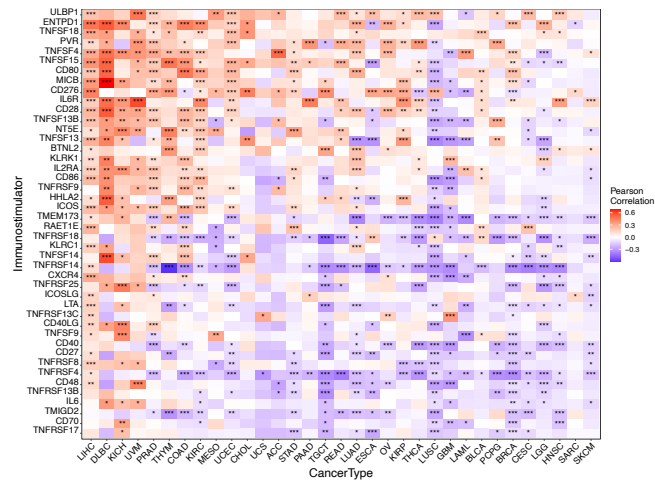

B

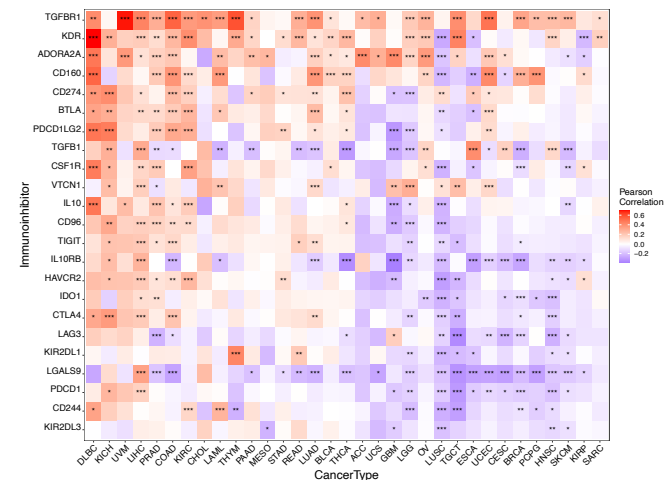

C

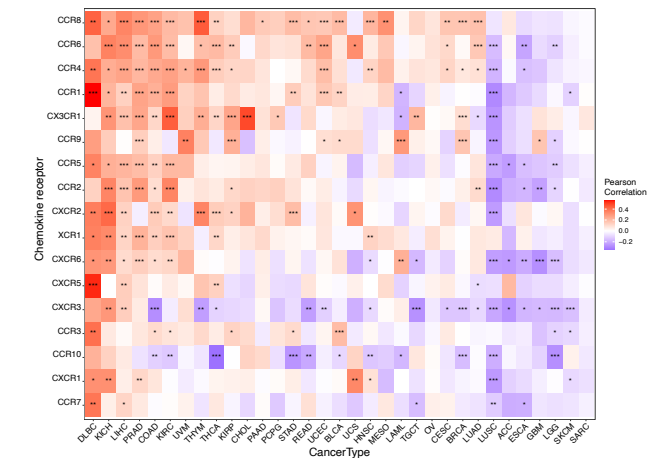

Supplement: MOESM6 [file 25194470]
